# Supplementary material for: Sex differences in hedonic feeding and characterizing the effects of antibiotic-induced microbiome disruption
Source: Research Square preprint supplement (doi:10.21203/rs.3.rs-9557496/v1), 2026-05-11
Supplement: Supplementary file 1 [file 3141cc8d251fbb8acbaba900.docx]

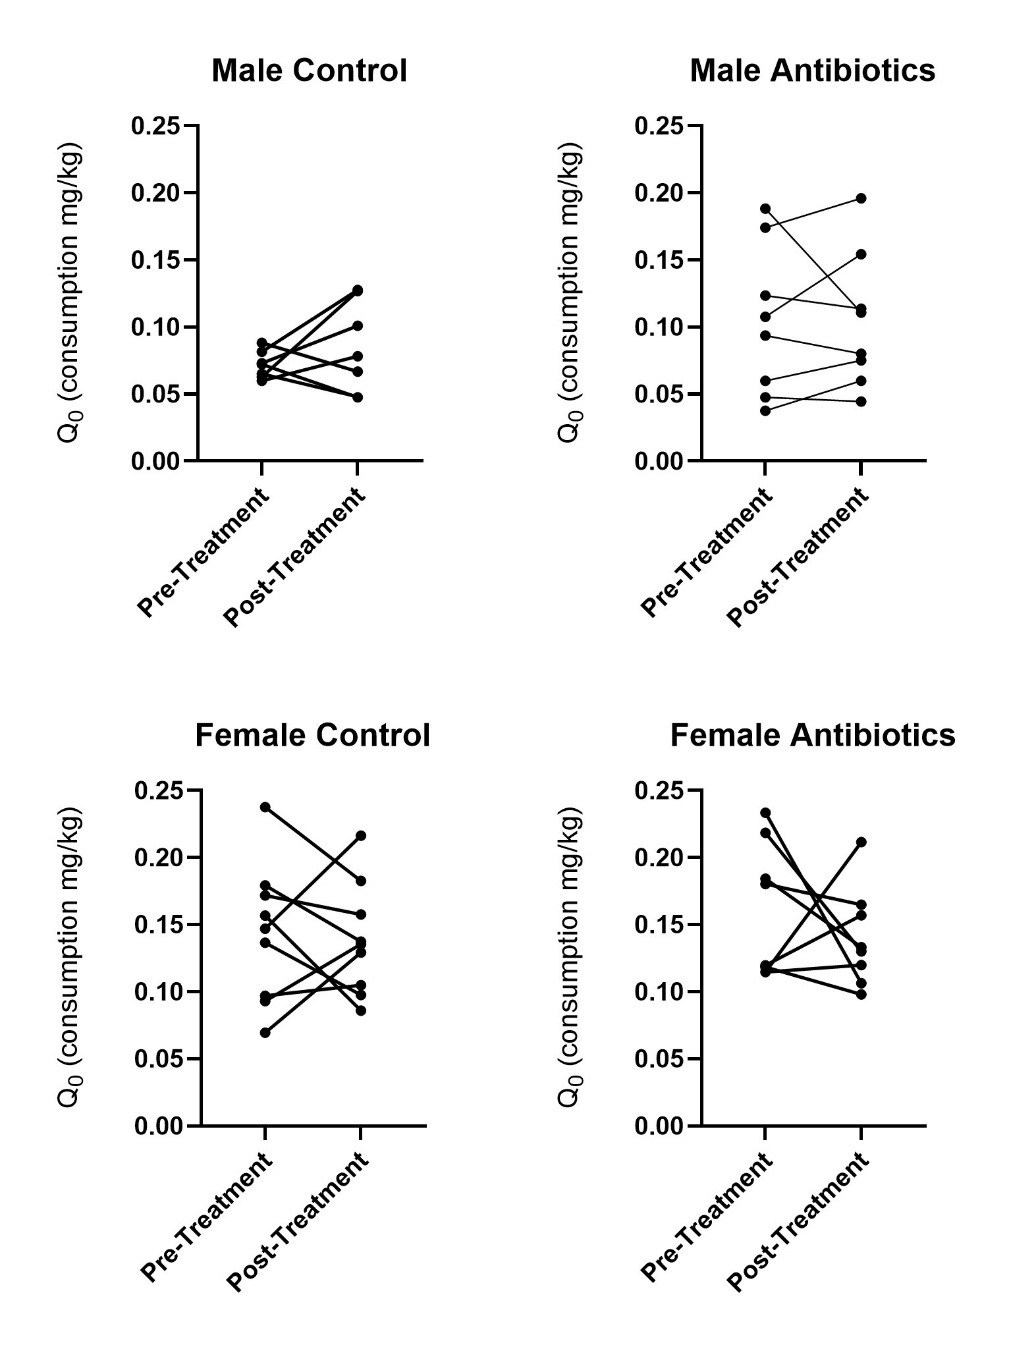


**Figure S1. Individual Q0 pre- vs. post-treatment by sex.** No significant differences in values pre- vs. post-treatment were determined with a paired t-test within each sex and treatment group.


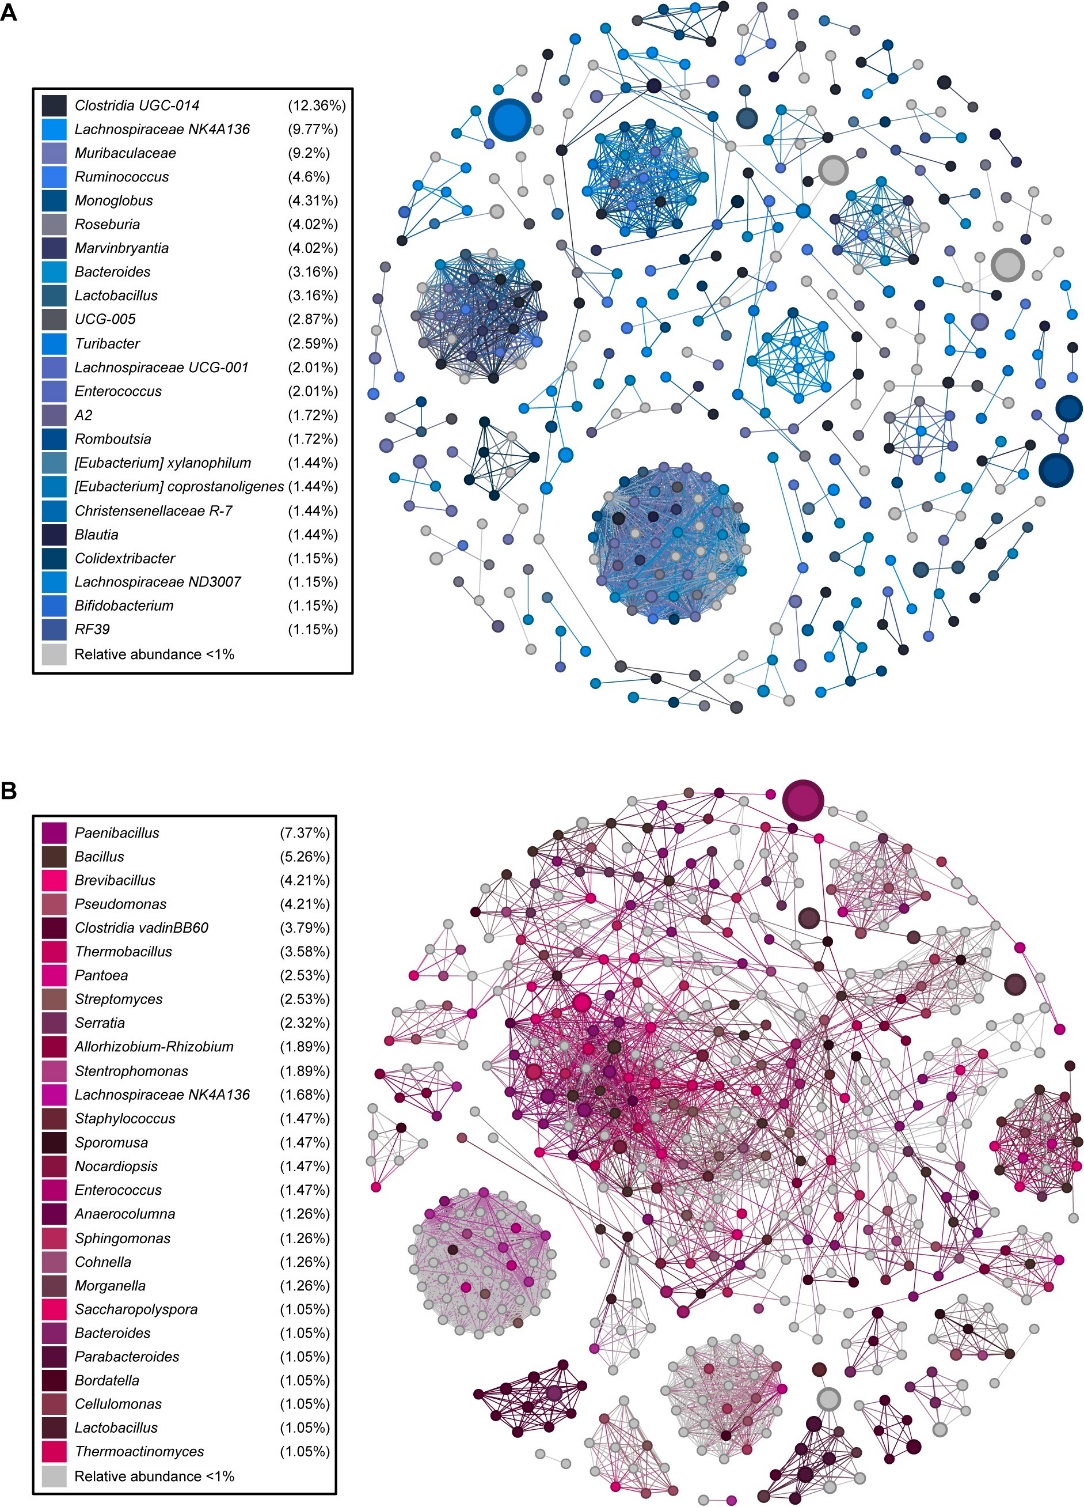


**Figure S2. Genus-level co-occurrence networks. A)** Control rats. **B)** Antibiotic-treated rats.


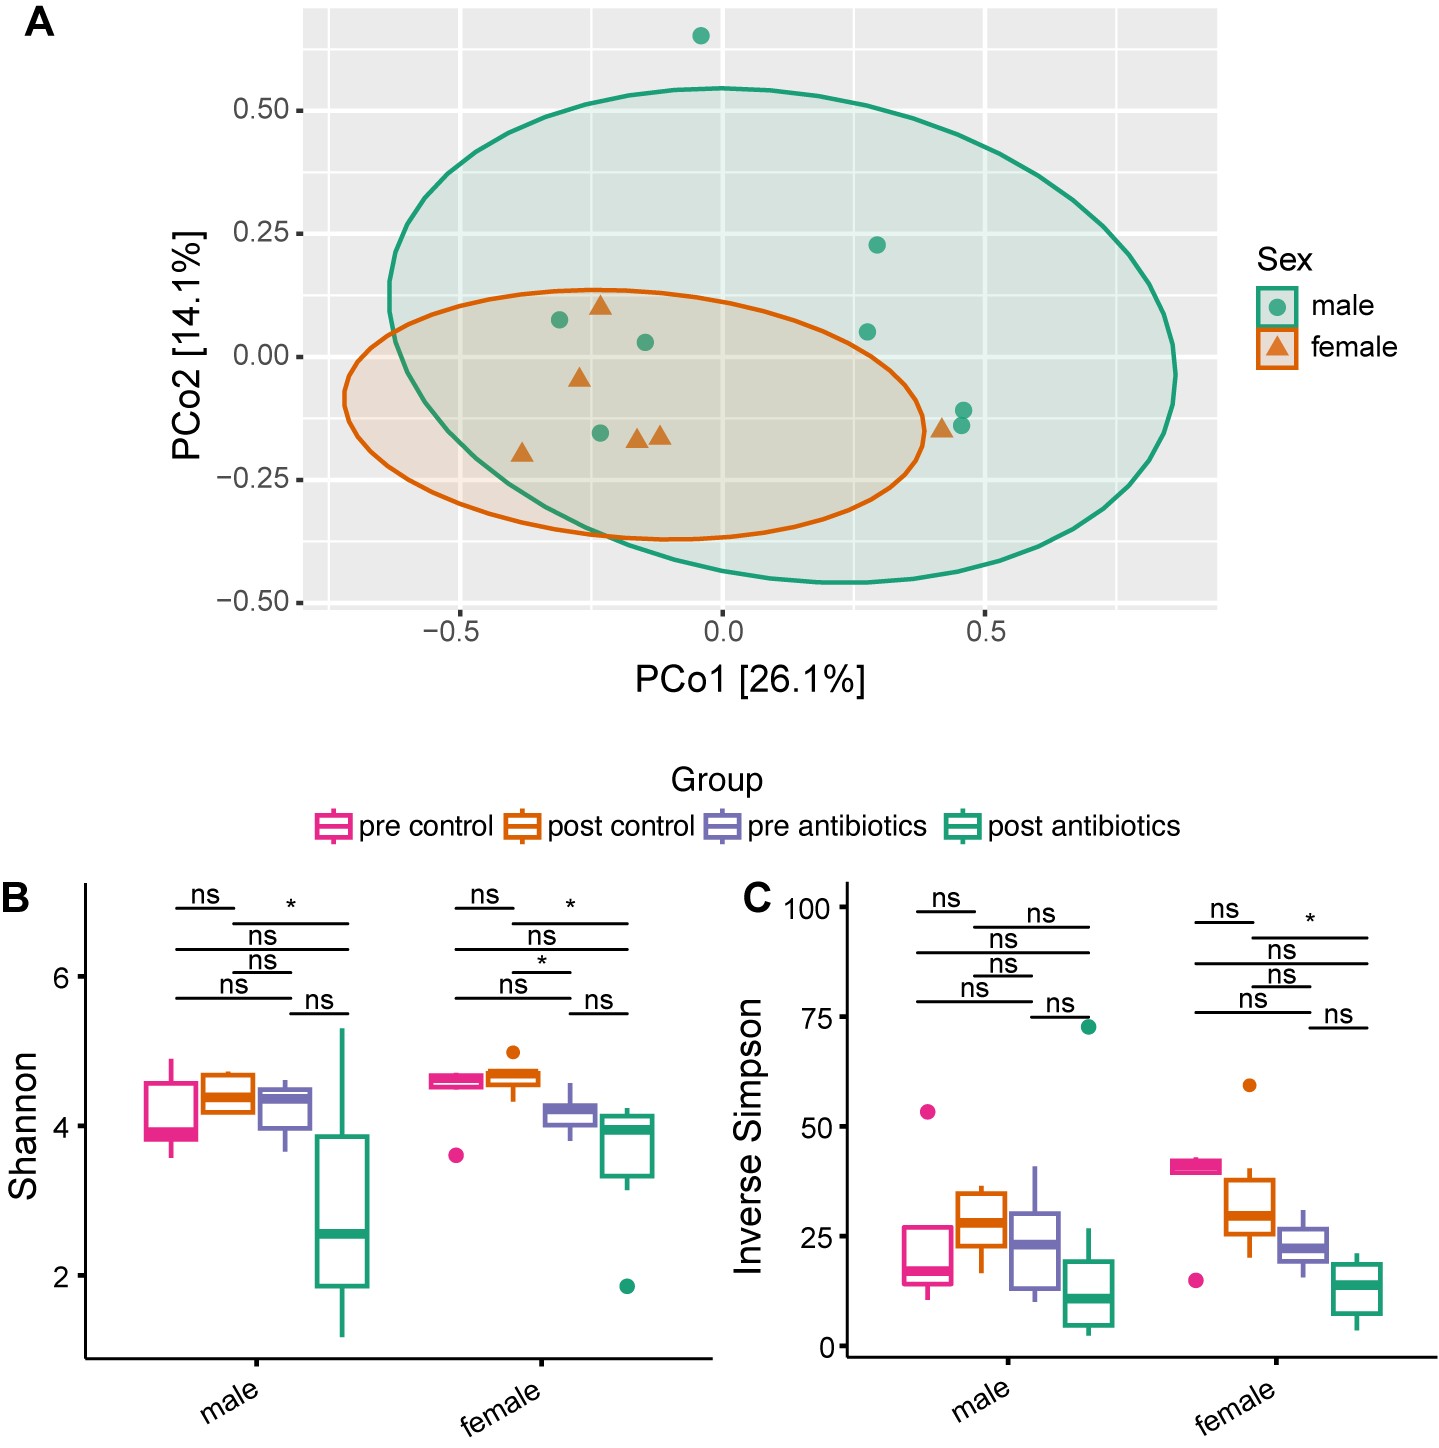
 **Figure S3. Sex does not significantly influence the fecal microbiome community structure.** **A)** Principal Coordinate Analysis (PCoA) of fecal microbiota from rats post-antibiotictreatment, based on Bray–Curtis dissimilarity of Amplicon Sequence Variant (ASV) abundances. **B)** Shannon diversity index and C) Inverse Simpson diversity index calculated from ratfecal samples separated by sex and treatment. Statistical significance between males and females was assessed using theWilcoxon rank-sum test (**p*<0.01).
