# Supplementary material for: Sex differences in hedonic feeding and characterizing the effects of antibiotic-induced microbiome disruption
Source: Research Square preprint supplement (doi:10.21203/rs.3.rs-9557496/v1), 2026-05-11
Supplement: Supplementary file 2 [file 6395da349977ec538e29e7f2.docx]

**Table 1. Average Number of Active/Inactive Lever Responses and Pellets Earned During 1-Hour FR Training Sessions Prior to BE Testing.** Values are n (SEM).

**Table 2. Fecal SCFA Composition Analyses.** Mean fecal SCFA levels reported in nmol/mg. Pre-treatment: Male Control (n = 3), Male Antibiotics (n = 8), Female Control (n = 6), Female Antibiotics (n = 6). Post-treatment: Male Control (n = 5), Male Antibiotics (n = 8), Female Control (n = 5), Female Antibiotics (n = 7).

**Table 3. Serum SCFA Composition Analyses**. Mean serum SCFA levels reported in µM. Male Control (n = 6), Male Antibiotics (n = 7), Female Control (n = 7), Female Antibiotics (n = 5).

**Table 4. Serum Bile Acid Composition Analyses.** Mean serum bile acid levels reported in µM. Male Control (n = 6), Male Antibiotics (n = 7), Female Control (n = 6), Female Antibiotics (n = 5).
